# Supplementary material
Source: PubMed Central journal article supplement (PMC3590031)
Supplement: supp_kws321_kws321_Web_Tables.Revised.pdf [file supp_kws321_kws321_Web_Tables.Revised.pdf]

**Web Table 1. Median and IQRs of Ages at Enrollment and Ages at Study Baseline, MACS and WIHS Individuals, Stratified by HIV Status and HAART Era (Pre-HAART: 1984-1995, HAART: 1996-2008)**

|                                       | 1984-1995, MACS |            |              |            | 1996-2008, MACS |            |              |            | 1996-2008, WIHS |            |              |            |
|---------------------------------------|-----------------|------------|--------------|------------|-----------------|------------|--------------|------------|-----------------|------------|--------------|------------|
|                                       | HIV-negative    |            | HIV-positive |            | HIV-negative    |            | HIV-positive |            | HIV-negative    |            | HIV-positive |            |
|                                       | Median          | IQR        | Median       | IQR        | Median          | IQR        | Median       | IQR        | Median          | IQR        | Median       | IQR        |
| Age at enrollment                     | 34.9            | 30.4, 40.4 | 34.0         | 30.2, 38.1 | 35.1            | 29.8, 41.0 | 34.0         | 29.1, 39.7 | 36.0            | 31.4, 40.8 | 37.0         | 32.7, 41.8 |
| Age at analysis baseline <sup>a</sup> | 35.0            | 35.0, 40.4 | 35.0         | 35.0, 39.0 | 43.5            | 38.5, 49.0 | 41.3         | 36.9, 46.0 | 36.5            | 35.0, 41.3 | 37.7         | 35.0, 42.5 |

HAART= Highly active antiretroviral therapy; HIV= human immunodeficiency virus; IQR= interquartile range; MACS= Multicenter AIDS Cohort Study; WIHS= Women’s Interagency HIV Study.

<sup>a</sup> Values at baseline, defined as earliest study visit after age 35 within the calendar period with specified HIV status.

**Web Table 2. Causes of Non-AIDS Death Among MACS and WIHS Individuals, Stratified by HIV Status and HAART Era (Pre-HAART: 1984-1995, HAART: 1996-2008)<sup>a</sup>**

|                       | 1984-1995, MACS             |                             | 1996-2008, MACS             |                             | 1996-2008, WIHS             |                              | TOTAL                 |
|-----------------------|-----------------------------|-----------------------------|-----------------------------|-----------------------------|-----------------------------|------------------------------|-----------------------|
|                       | % of HIV-negative<br>(n=51) | % of HIV-positive<br>(n=58) | % of HIV-negative<br>(n=80) | % of HIV-positive<br>(n=84) | % of HIV-negative<br>(n=53) | % of HIV-positive<br>(n=241) | % of total<br>(n=567) |
| Cardiovascular        | 35                          | 33                          | 25                          | 24                          | 8                           | 16                           | 21                    |
| Injury or poisoning   | 29                          | 12                          | 10                          | 23                          | 23                          | 24                           | 21                    |
| Non-AIDS malignancies | 16                          | 10                          | 15                          | 15                          | 13                          | 19                           | 16                    |
| Liver-related         | 0                           | 5                           | 1                           | 8                           | 6                           | 20                           | 11                    |
| Pulmonary             | 10                          | 10                          | 3                           | 10                          | 15                          | 3                            | 6                     |
| Renal                 | 0                           | 5                           | 0                           | 4                           | 6                           | 6                            | 4                     |
| Gastrointestinal      | 0                           | 3                           | 3                           | 4                           | 0                           | 4                            | 3                     |
| All other causes      | 10                          | 21                          | 44                          | 13                          | 30                          | 9                            | 18                    |

AIDS= acquired immune deficiency syndrome; HAART = highly active antiretroviral therapy; HIV= human immunodeficiency virus; MACS = Multicenter AIDS Cohort Study; WIHS = Women's Interagency HIV Study.

<sup>a</sup> Mortality categories adopted from French AL, Gawe SH, Hershov R, et al. Trends in mortality and causes of death among women with HIV in the United States: a 10-year study. *J Acquir Immune Defic Syndr.* 2009;51(4):399-406.

**Web Table 3. Cause-Specific Hazard Ratios From a Multivariate Model Among MACS Individuals, Comparing the Pre-HAART Era (1984-1995) to the HAART Era (1996-2008)**

|                            | HIV-negative death |            | HIV-positive non-AIDS death |            | HIV-positive AIDS death |            |
|----------------------------|--------------------|------------|-----------------------------|------------|-------------------------|------------|
|                            | HR                 | 95% CI     | HR                          | 95% CI     | HR                      | 95% CI     |
| HAART era                  | 0.77               | 0.44, 1.34 | 0.67                        | 0.44, 1.03 | <sup>b</sup> 0.10*      | 0.08, 0.12 |
| < College education        | 1.86*              | 1.29, 2.69 | 1.35                        | 0.93, 1.97 | 1.20*                   | 1.07, 1.35 |
| Unemployment               | 1.22               | 0.73, 2.02 | 1.60*                       | 1.08, 2.36 | 1.74*                   | 1.51, 2.02 |
| >13 alcoholic drinks/week  | 1.86*              | 1.20, 2.87 | 1.28                        | 0.80, 2.05 | 0.91                    | 0.78, 1.08 |
| Injection drug use history | 2.66*              | 1.55, 4.57 | <sup>a</sup> 1.00           | 0.61, 1.64 | 0.99                    | 0.83, 1.16 |
| Depression                 | 1.60*              | 1.07, 2.38 | 1.09                        | 0.77, 1.54 | 1.24*                   | 1.09, 1.41 |
| Hepatitis B or C infection | 2.55*              | 1.44, 4.53 | 1.87*                       | 1.21, 2.90 | <sup>b</sup> 1.08       | 0.88, 1.33 |
| Years of age at enrollment | 0.98               | 0.95, 1.02 | 1.01                        | 0.98, 1.04 | <sup>b</sup> 0.94*      | 0.92, 0.95 |

AIDS= acquired immune deficiency syndrome; CI = confidence interval; HAART = highly active antiretroviral therapy; HIV= human immunodeficiency virus; HR = estimated hazard ratio; MACS = Multicenter AIDS Cohort Study.

\* indicates  $P < 0.05$ .

<sup>a</sup> indicates significant difference ( $P < 0.05$ ) between HIV-negative hazard ratio and HIV-positive non-AIDS hazard ratio.

<sup>b</sup> indicates significant difference ( $P < 0.05$ ) between HIV-positive non-AIDS hazard ratio and AIDS hazard ratio.

**Web Table 4. Sensitivity Analysis: Cause-Specific Hazard Ratios From a Multivariate Model Among MACS and WIHS Individuals in the HAART Era, 1996-2008, All Unknown Deaths Classified As AIDS-Related**

|                            | HIV-negative death |                         | HIV-positive non-AIDS death |                         | HIV-positive AIDS death |            |
|----------------------------|--------------------|-------------------------|-----------------------------|-------------------------|-------------------------|------------|
|                            |                    | 95 CI                   |                             | 95 CI                   |                         | 95 CI      |
| WIHS membership            | 0.96               | 0.58, 1.57              | 1.24                        | 0.92, 1.67 <sup>b</sup> | 0.74*                   | 0.62, 0.88 |
| Unemployment               | 1.75*              | 1.12, 2.75              | 1.94*                       | 1.44, 2.63              | 2.25*                   | 1.86, 2.71 |
| Smoking history            | 1.37               | 0.84, 2.23              | 1.54*                       | 1.10, 2.18              | 1.20                    | 0.99, 1.46 |
| Injection drug use history | 3.27*              | 2.08, 5.14 <sup>a</sup> | 1.34                        | 1.00, 1.79              | 1.13                    | 0.93, 1.36 |
| Depression                 | 1.34               | 0.93, 1.94              | 1.45*                       | 1.15, 1.83              | 1.36*                   | 1.17, 1.58 |
| Hepatitis B or C infection | 2.49*              | 1.56, 3.97              | 1.96*                       | 1.49, 2.59 <sup>b</sup> | 1.35*                   | 1.12, 1.64 |

AIDS= acquired immune deficiency syndrome; CI = confidence interval; HAART = highly active antiretroviral therapy; HIV= human immunodeficiency virus; = estimated hazard ratio; MACS = Multicenter AIDS Cohort Study; WIHS = Women’s Interagency HIV Study.

\* indicates  $P < 0.05$ .

<sup>a</sup> indicates significant difference ( $P < 0.05$ ) between HIV-negative hazard ratio and HIV-positive non-AIDS hazard ratio.

<sup>b</sup> indicates significant difference ( $P < 0.05$ ) between HIV-positive non-AIDS hazard ratio and AIDS hazard ratio.

**Web Table 5. Sensitivity Analysis: Cause-Specific Hazard Ratios From a Multivariate Model Among MACS and WIHS Individuals in the HAART Era, 1996-2008, All Unknown Deaths Classified As Non-AIDS-Related**

|                            | HIV-negative death |            | HIV-positive non-AIDS death |            | HIV-positive AIDS death |            |
|----------------------------|--------------------|------------|-----------------------------|------------|-------------------------|------------|
|                            | HR                 | 95 CI      | HR                          | 95 CI      | HR                      | 95 CI      |
| WIHS membership            | 0.96               | 0.58, 1.57 | 0.88                        | 0.70, 1.10 | 0.83                    | 0.68, 1.01 |
| Unemployment               | 1.75*              | 1.12, 2.75 | 1.77*                       | 1.40, 2.24 | <sup>b</sup> 2.53*      | 2.04, 3.14 |
| Smoking history            | 1.37               | 0.84, 2.23 | 1.45*                       | 1.11, 1.91 | 1.17                    | 0.94, 1.45 |
| Injection drug use history | 3.27*              | 2.08, 5.14 | <sup>a</sup> 1.43*          | 1.13, 1.81 | <sup>b</sup> 1.03       | 0.83, 1.27 |
| Depression                 | 1.34               | 0.93, 1.94 | 1.39*                       | 1.15, 1.68 | 1.38*                   | 1.17, 1.64 |
| Hepatitis B or C infection | 2.49*              | 1.56, 3.97 | 1.70*                       | 1.35, 2.13 | 1.40*                   | 1.13, 1.74 |

AIDS= acquired immune deficiency syndrome; CI = confidence interval; HAART = highly active antiretroviral therapy; HIV= human immunodeficiency virus; HR = estimated hazard ratio; MACS = Multicenter AIDS Cohort Study; WIHS = Women’s Interagency HIV Study.

\* indicates  $P < 0.05$ .

<sup>a</sup> indicates significant difference ( $P < 0.05$ ) between HIV-negative hazard ratio and HIV-positive non-AIDS hazard ratio.

<sup>b</sup> indicates significant difference ( $P < 0.05$ ) between HIV-positive non-AIDS hazard ratio and AIDS hazard ratio.

**Web Table 6. Cause-Specific Mortality Among MACS Participants With Known Date of Seroconversion, by HAART Era, by Duration of Infection Prior to Baseline<sup>a</sup>, and by Year of Seroconversion**

|                                                        | 1984-1995 (Pre-HAART era) |            |                         |               | 1996-2008 (HAART era)   |            |                         |               |
|--------------------------------------------------------|---------------------------|------------|-------------------------|---------------|-------------------------|------------|-------------------------|---------------|
|                                                        | n (Median age at entry)   |            | n (Median age at death) |               | n (Median age at entry) |            | n (Median age at death) |               |
|                                                        | Total                     | AIDS death | Non-AIDS death          | Unknown death | Total                   | AIDS death | Non-AIDS death          | Unknown death |
| <b>Time from HIV infection to baseline<sup>a</sup></b> |                           |            |                         |               |                         |            |                         |               |
| <0 years                                               | -                         | -          | -                       | -             | -                       | -          | -                       | -             |
| 0-2 years                                              | 245 (39.2)                | 75 (46.0)  | 16 (50.0)               | 1 (42.4)      | 74 (45.5)               | 1 (56.6)   | 1 (60.2)                | 2 (55.3)      |
| 2-4 years                                              | 48 (35.0)                 | 15 (38.4)  | -                       | -             | 28 (40.3)               | 4 (51.0)   | -                       | 3 (50.7)      |
| 4-6 years                                              | 37 (35.0)                 | 9 (37.8)   | -                       | 1 (37.9)      | 51 (42.2)               | 9 (46.7)   | 5 (58.8)                | -             |
| 6-8 years                                              | 23 (35.0)                 | 3 (36.4)   | -                       | -             | 54 (39.4)               | 13 (42.8)  | 3 (42.0)                | -             |
| 8-10 years                                             | 14 (35.0)                 | 3 (35.4)   | -                       | -             | 54 (41.4)               | 6 (48.6)   | 3 (49.2)                | 4 (54.3)      |
| >10 years                                              | 1 (35.0)                  | -          | -                       | -             | 94 (41.2)               | 15 (46.1)  | 4 (43.4)                | 8 (41.0)      |
| <b>Date of seroconversion</b>                          |                           |            |                         |               |                         |            |                         |               |
| After 1996                                             | -                         | -          | -                       | -             | 67 (44.8)               | -          | -                       | 1 (43.1)      |
| 1994-95                                                | 16 (42.5)                 | -          | -                       | -             | 22 (39.8)               | 1 (56.6)   | 1 (60.2)                | 1 (67.5)      |
| 1992-93                                                | 26 (37.9)                 | -          | 1 (58.6)                | -             | 36 (37.6)               | 4 (51.0)   | -                       | 3 (50.7)      |
| 1990-91                                                | 44 (39.9)                 | 2 (43.4)   | 1 (62.1)                | -             | 50 (41.8)               | 11 (44.3)  | 5 (58.8)                | 1 (40.7)      |
| 1988-89                                                | 48 (38.9)                 | 11 (44.6)  | 1 (37.3)                | -             | 45 (41.5)               | 11 (43.0)  | 3 (42.0)                | -             |
| 1986-87                                                | 82 (35.8)                 | 24 (46.6)  | 6 (46.7)                | -             | 57 (41.0)               | 6 (48.6)   | 4 (44.7)                | 4 (54.3)      |
| 1984-85                                                | 152 (35.0)                | 68 (42.0)  | 7 (50.6)                | 2 (40.2)      | 78 (42.1)               | 15 (43.1)  | 3 (50.2)                | 7 (41.4)      |

AIDS= acquired immune deficiency syndrome; HAART = highly active antiretroviral therapy; HIV= human immunodeficiency virus; MACS = Multicenter AIDS Cohort Study; WIHS = Women's Interagency HIV Study.

<sup>a</sup> Baseline defined as earliest study visit after age 35 within the calendar period with specified HIV status.

Note: only 19 WIHS women in the study population had known dates of seroconversion.

**Web Table 7. Characteristics of MACS Participants in the HAART Era With Known Date of Seroconversion, Stratified by Date of Seroconversion**

|                                           | MACS, 1996-2008 (HAART era) |     |                        |    |
|-------------------------------------------|-----------------------------|-----|------------------------|----|
|                                           | Seroconversion < 1992       |     | Seroconversion >= 1992 |    |
|                                           | n                           | %   | n                      | %  |
| Individuals                               | 230                         |     | 125                    |    |
| Person-years (p-y)                        | 2,047                       |     | 891                    |    |
| p-y before HAART initiation               | 626                         | 31  | 265                    | 30 |
| p-y after HAART initiation                | 1,421                       | 69  | 625                    | 70 |
| Alive at exit of analysis                 | 160                         | 70  | 114                    | 91 |
| AIDS deaths                               | 43                          | 19  | 5                      | 4  |
| Non-AIDS deaths                           | 15                          | 7   | 1                      | 1  |
| Deaths of unknown cause                   | 12                          | 5   | 5                      | 4  |
| All-cause death per 100,000 p-y           | 3,420                       |     | 1,235                  |    |
| White, non-Hispanic                       | 196                         | 85  | 103                    | 82 |
| High school education <sup>a</sup>        | 226                         | 100 | 116                    | 94 |
| College education <sup>a</sup>            | 123                         | 54  | 70                     | 57 |
| Employed <sup>a</sup>                     | 174                         | 76  | 100                    | 80 |
| Smoking history <sup>a</sup>              | 164                         | 71  | 85                     | 68 |
| 14+ alcoholic drinks/week <sup>a</sup>    | 19                          | 8   | 12                     | 10 |
| Injection drug use history <sup>a</sup>   | 26                          | 11  | 13                     | 10 |
| Any drug use history <sup>a</sup>         | 214                         | 93  | 111                    | 89 |
| Depressive symptoms <sup>a</sup>          | 61                          | 27  | 39                     | 31 |
| HBV at study entry                        | 11                          | 5   | 4                      | 3  |
| HCV at study entry                        | 0                           | 0   | 1                      | 1  |
| HBV or HCV at study entry                 | 11                          | 5   | 5                      | 4  |
| Median (IQR) age at enrollment            | 30.6 (27.2, 35.4)           |     | 31.3 (26.3, 37.8)      |    |
| Median (IQR) age at baseline <sup>a</sup> | 41.6 (37.8, 46.3)           |     | 42.4 (36.3, 47.5)      |    |

HAART= Highly active antiretroviral therapy; HBV = hepatitis B virus; HCV = hepatitis C virus; HIV= human immunodeficiency virus; IQR= interquartile range; MACS= Multicenter AIDS Cohort Study; WIHS = Women's Interagency HIV Study.

<sup>a</sup> Values at baseline, defined as earliest study visit after age 35 within the calendar period with specified HIV status.

Note: only 19 WIHS women in the study population had known dates of seroconversion.
